# Supplementary material for: Development of a sensitive real-time quaking-induced conversion (RT-QuIC) assay for application in prion-infected blood
Source: PubMed Central journal article supplement (PMC10621866; doi:10.1371/journal.pone.0293845), 2023-11-02
Supplement: pone.0293845.s009.pdf [file pone.0293845.s009.pdf]

Purification gel for E7\_E8 truncated sheep recPrP  
(SDS-PAGE + coomassie blue stain)

M 1 2 3 4 5 6 7 8 9 10 11

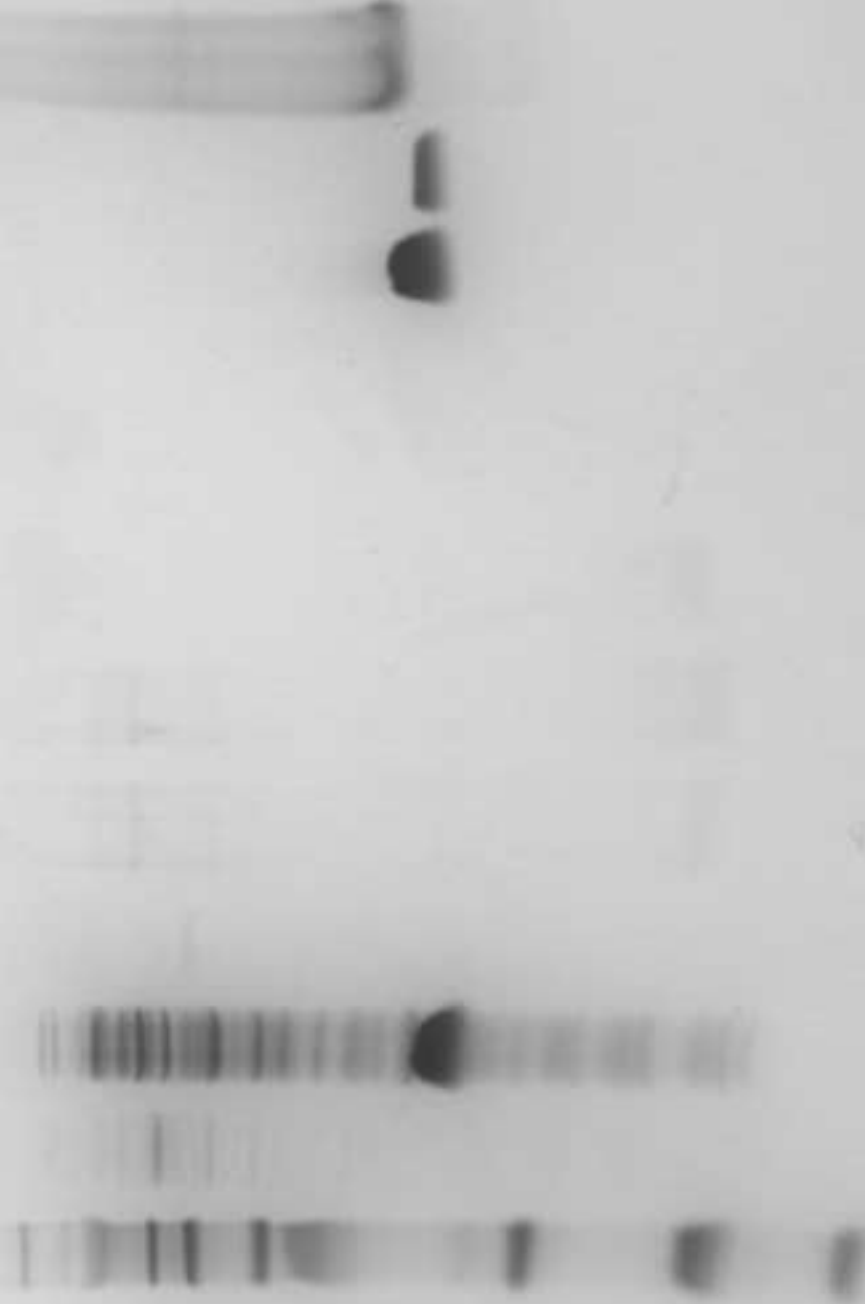

Key: M, molecular weight marker SeeBlue Plus2 pre-stained protein standard (Fisher Scientific); lanes 1-11 represent samples taken during stages of E7\_E8 recPrP purification: 1, uninduced cells; 2, induced cells; 3, supernatant; 4, resin bedding; 5, resin flow through; 6, denaturing step; 7, gradient refolding; 8, isocratic refolding; 9, elution fraction E7; 10, elution fraction E8; 11, resin wash.  
Image captured using Biorad gel doc XR system, Quantity One software (v4.6.7).  
Annotations in GIMP (v2.10.34). This raw image was used to generate S2 Fig, panel A.

M 1 2 3 4 5 6 7 8 9 10 11

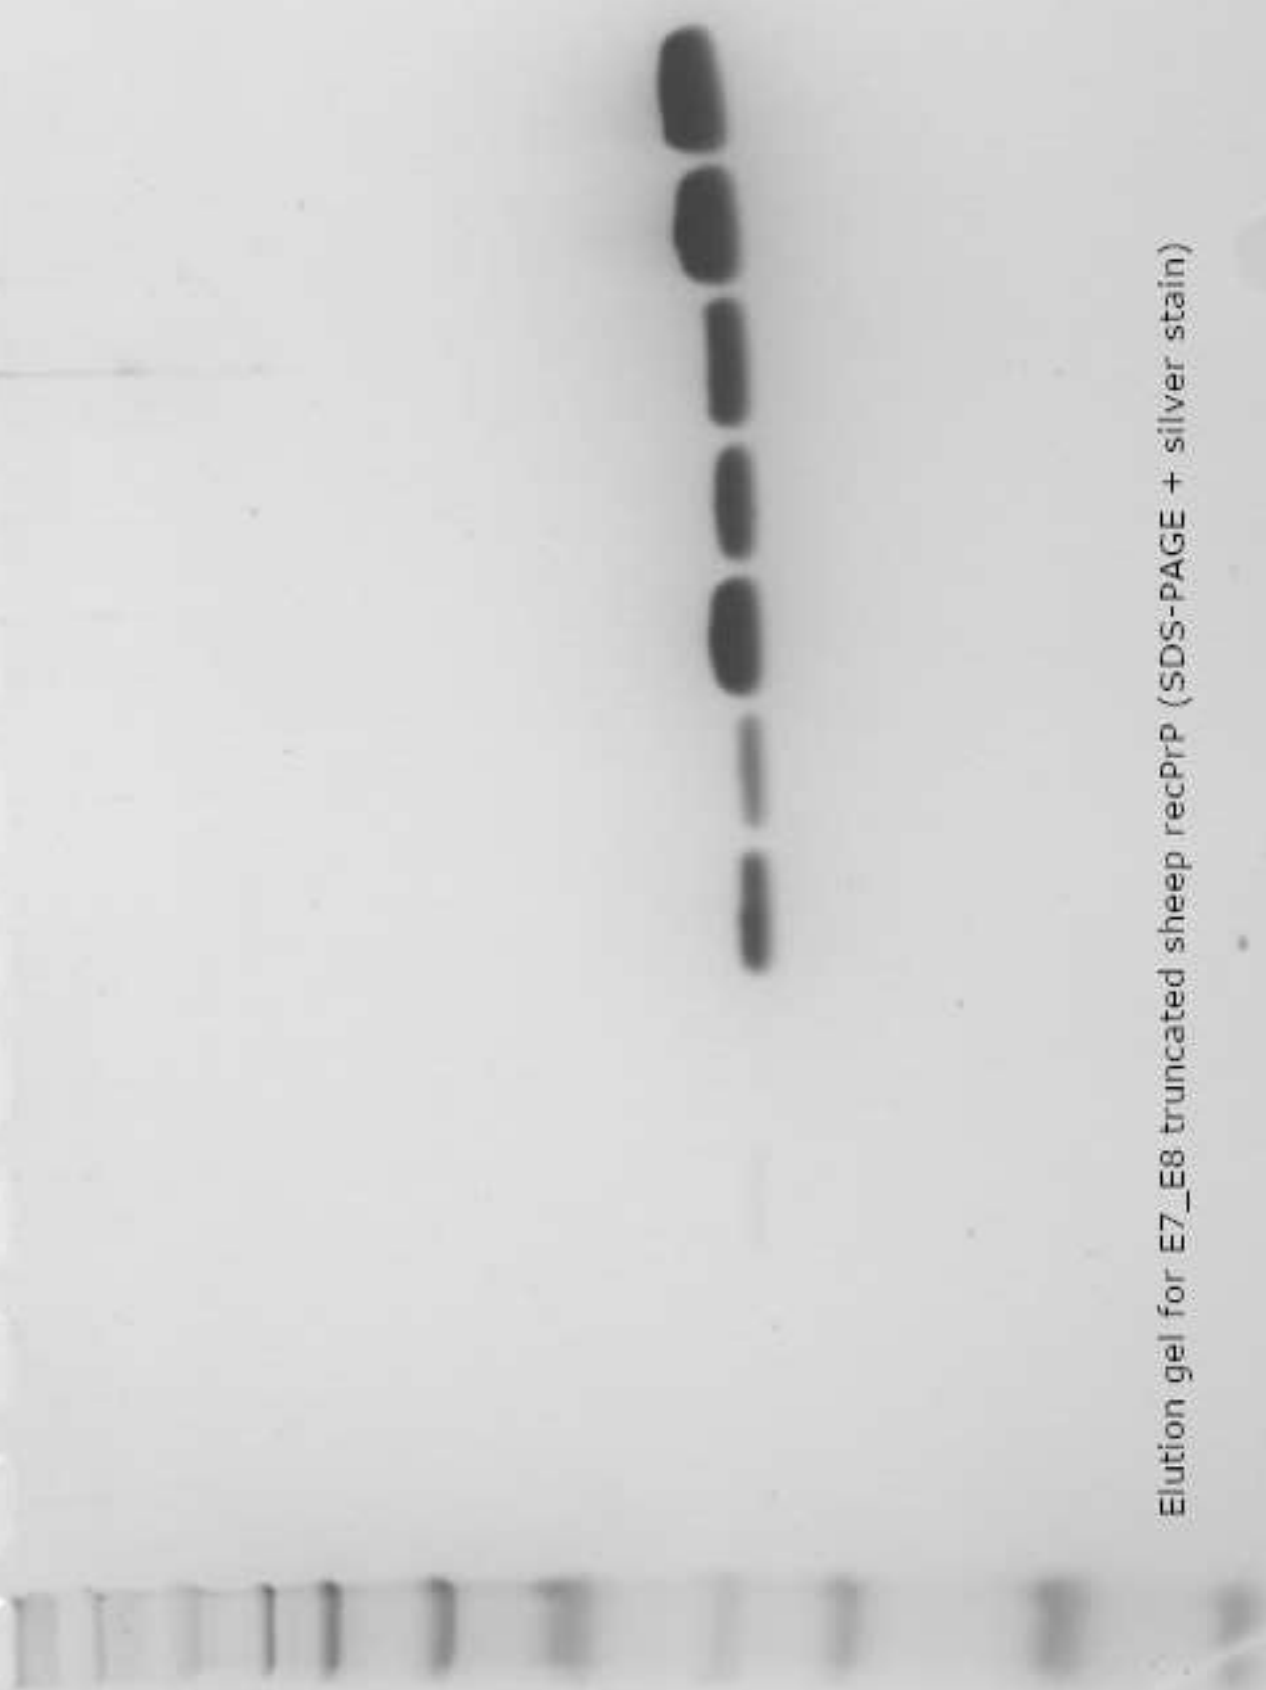

Elution gel for E7\_E8 truncated sheep recPrP (SDS-PAGE + silver stain)

Key: M, molecular weight marker, SeeBlue Plus2 pre-stained protein standard (Fisher Scientific). Lanes 1-9 represent eluted fractions E1-E9; 10, dialysed recPrP stock; 11, filtered recPrP stock. Image captured using Biorad gel doc XR system, Quantity One software (v4.6.7). Annotations in GIMP (v2.10.34). This raw image was used to generate S2 Fig, panel B.
